# Supplementary material for: The resilience of Jewish communities living in the diaspora: a scoping review
Source: Front Psychol. 2023 Aug 16;14:1215404. doi: 10.3389/fpsyg.2023.1215404 (PMC10466794; doi:10.3389/fpsyg.2023.1215404)
Supplement: Supplementary file 3 [file Data_Sheet_3.xlsx]

## Sheet: Judith
nr	Author/Study	Country	Funding source	Declaration of Interest	Study aim/objective/research questions (Primary/Secondary aims)	Study design	Methodology (assessments) -exactere beschrijving van de werkwijze	Description of participants in the study (Inclusion/Exclusion criteria)	Number participants in the study (if applicable for each group)	description of the diaspora population in the study and the hosting country	1. concept of resilience decribed	1. definition of resilience	1. underlying theoretical model, incl author	2. Which trauma or underlying causes for stress	3 strengthening factors, mechanisms	4 weakening factors, mechanisms	neutral factors	5 measuring methods and outcomes for community resilience used in study. Yes, no …	5 measuring methods and outcomes for individual resilience used in study. Yes, no, …	6. measuring methods and outcomes quality of life of members of members of community. Yes/no, …	6. what does study reveal on interaction individual community resilience?	7. What states the study on gaps in literature on community resilience?	8. does the study mention ethical issues	8. do we see any other ethical issues with this study	Other important information
1	Azoulay, B.; Sanchez, W.;	united states	no	not available	to demonstrate some of the cultural factors described; to provide basic inforation to improve the understanding of mental health counselors, working with these families, so culturally affirming and enabling tratment, interventions will be developed, affirm cultural diversity in US and world	case study	case study	Isreali immigrant family (fictions?)	one family: father Eli, mother Miriam and 2 daughters and the families of Eli and of Miriam (fiction/)	Israeli immigrants in th USA: voluntary, coming to improve their lives and leave because of personal complexity at home. USA: welcoming, f.i. accept double nationality only for israeli	dynamic change	no definition	Scapocznik & Kurtines (1993, p. 401)	the effect of Holocaust; the migration itself from israel to diaspora (Yordim, negative connotation)	the wish to improve oneself, economicly, eductional and professional; economicly priviledged community; white community; friendship is very appreciated; family/marriage is central focus point -> expectations; sense of belonging; self choosen support system around learning and using Hebrew, social, religious and cultural	psychochological issues, connected to family (holocaust, expectations parents): repressing their past, dreams and fears, disconnetion with Israel and niet efinintief settelen	complexity due to political historical context, dual citizenship (Israel & US); the complexity of Israeli identity; bilanguality; having served in army; Israeli immigrants not perceived as minority. Being jewish = religious or cultural; socialpolitical relation between Israel - USA; Israel is a young country of migrants; subcultural distinctions; sense of belonging to Israel; relations american-j…	no	no	no	the importance of perception of others and self; the perception of mental health workers	develop more awareness and affirmative treatment for israeli immigrants in VS ; kack of knowldege on jews as minority	no	no	"oude" joden en nieuwkomers boteren niet
2	Chalew, G. N.;	united states	no	not available	How did the New Orleans Jewish lay and professional leadership rebuild its commu- nity when its leaders and members were scattered across the country and one-third of its pre-Katrina population would decide not to return, its infrastructure was damaged, its professional staff and volunteers were themselves victims of the disaster, and its ultimate fate depended on circumstances outside its contro…	desciptive article	"case study"	jewish community of New Orleans, the Jewish Federation of Greater New Orleans	10.0000 members	well established, had all kinds of buildings and organizations	three phases: 1) Pikuach Nefesh: Saving Lives; 2) Return to New Orleans and Initial Recovery 3) Renaissance: Byond recovery to transformation	use the disaster as a foundation to building a stronger community	no	When the levees breached in late August, 2005, the resulting floods damaged 80% of the homes and 70% of the businesses owned by the 10,000 members of the New Orleans Jewish community. In addition, the campus that housed the New Orleans Jew- ish Day School, the offices of the Federa- tion, and the Metairie Jewish Community Center took in water, as did two syna- gogues. In addition, Beth Israel Con…	(1) the overwhelming generosity of the American Jewish community, which has provided the funds to sustain the organized Jewish community in the two years since Katrina and (2) the professional and lay leadership who have used the opportunity provided by that generous support to build for a future when the New Orleans Jewish community will stand on its own two feet again.		phase 1: ( 4 mnths) Rescue (food, housing), find everyone & build database: contacts between members & general information.Assess damage, start building partnerships: Phase 2: ( 8 months) facilitate the return of New Orleanians to their home, serve as the conduit for financial aid that flowed into the community, coordinate the efforts of the many Jewish volunteers coming from across the country t…	no	no	no	focus on attracting an integrating newcomers. (150 young jews came) and the increased spirit of community cohesion to encourage centralization of services, sharing space, and other efficiencies	no	no	no
3	Elo, M.; Vemuri, S.;	US, Israel, Germany	Foundation of Economic Education, Finland, under [grant number 1-222- 28].	not available	to understanding of how diaspora can self-organize human resource utilization and better employment of its inherent talent, and thus benefit both host and home countries. Understanding resource employ- ment is important for sustainable diaspora management and policy-making: how the diaspora community supports and organizes development internally (self-organized) in the difficult phase after migra…	first, it presents theories explaining diaspora resource employment and organization in the pre- and post-migration phases. It explains the research approach and context. Second, it analyses the case of Bukharian Jewish diaspora. Third, it pre- sents and discusses the findings and in the end it wraps-up the study with conclusions and implications.	(economic) descriptive case study research design: Primary data was collected during 2012–2015 from multiple sources including field trips to Uzbekistan, Israel, the USA and Germany, personal in-depth inter- views and focus group interviews of Bukharian Jewish diaspora, various ethnographic methods as participant observers, photographic documentation, museum, synagogue and business visits, dis- c…	The Bukharian Jews migrated mainly as refugees and on the basis of a list of potential receiving countries. After the initial transition phase, often in Austria, the majority of the Bukharian Jews moved to Israel and the USA, while some stayed in Austria and Germany (cf. Levin 2014). A particular feature in the host country contexts of the USA and Israel was that a network of extant Bukharian Jew…	er zijn ong. 200 - 250 k Buharian wereldwijd. Meesten nu in Israel (ong. 100.000), de rest in diaspora, waarvan 50.000 NY).	Post Sovjet era Bukharian Jewish diaspora (Central Asia), refugees, due to religious tensions in Central Asia. the Bukharian Jewish diaspora did not merge with other incumbent Jewish communities in host countries due to their cultural and religious differences. The key flows of their migration are organized rather collectively structuring the immigration as families, clans and groups, not on indi…	positive organizational scholarship (POS) (Cameron and Caza 2004) on organizing diaspora resources through various network organizations (Granovetter 2005; Nohria and Eccles 1992), and combining diaspora theories on resources (Tung 2008) and resource-based view (RBV) (Barney 2001a, 2001b)....POS to study of especially positive outcomes, processes, and attributes of organizations and their members…	no definition		unvoluntary migration/refugees	One potential explanation is the cohesive motivation for improved livelihood, economic pros- perity, community progress, education, societal status and maintenance of aspects of cultural heri- tage. Perhaps even the notion of distinct Bukharianness as a Jewish identity forms a socio-cultural motivation for action and organization. The significant results are not an outcome of a contextual trigger…	the role of education and post-migration re-accreditation makes it hard to integrate in the host community: t is also a problem for managing the diaspora in future as the fragmented language use hinders communication and self-organization, already now they have sub-communities which have emerged partially due to language preferences. assimilation endangers their culture-specific competitive advan…	phases: ;the Bukharian Jewish World Congress: international network; The Bukharian Jewish diaspora has multiple levels of organization. First, the extended family unit is of significance as the most intimate form of resource organization since the collective nature of the social norms and culture influence also the individual resources. Family units often live in large trans-generation houses and…	prosperity and entrepreneurship	no	no	altruism and ethnic, cultural and social motivations to support the homeland or co-ethnic communities (cf. Brinkerhoff 2009; Elo and Jokela 2014). The self-organization of this diaspora is strongly built on its Jewish ontology and inherent values and norms regulating the ideal or good ‘Bukharian Jew’ – concept.	multi-level analysis is necessary to capture the essence of the resource organization affected by mobility, we suggest that diaspora theory needs additional conceptualization on resources and diaspora agency, and post-migration dynamics to provide instruments for better diaspora resource management and policies. Bottom-up organizational models need to be explored where migrant human resources and…	no	no	1) organizing diaspora as a self-organizing entity (Dutia 2012; Kuznetsov 2008); 2) the push&pull factors of the home land and host land; gender issue: both genders have their own forms of organizations for resource and business development in addition to the generic organizations; The Bukharian Jewish diaspora has multiple levels of organization. First, the extended family unit is of significanc…
4	Frogel, E.;	united states	no	not available	This study contributes to the field of psychology by adding to the minimal literature about this small immigrant population, and providing helpful information for clinicians to increase multicultural awareness about immigrant populations in the U.S. - > problem statement: The processes of acculturation may be experienced differently by first and second- generation Afghan immigrants. As a result t…	qualitative research to describe narratives	semi structured interviews with questions p 51-53, and Thematic Analysis research methods model, phenomenological approach, ethnographic	Afghan Jews	six male and female first generation and six male and female second generation > 18 years	app 5000 people fled from 1948-1977. 1 jew still living there (in current war he has left too, was on TV). Most fled to Israel, US 2nd. Now in US app 1000 Afghan Jews, most in Queens, NY, racially very mixed community. Afghan Jews are no different than other immigrant groups in this respects, as they came to the U.S. looking for safety and opportunity, yet are still strongly tied to their cultura…	a prevailing attitude and strength that acted as a protective factor for many Afghan Jewish immigrants of both generations. When faced with adversity, this attitude was helpful to them in persevering and moving forward with their life. The hopefulness, humor, lightheartedness, and strength indicative of this attitude, helped them manage many hardships as well as personal struggles that were overc…	no definition	an ecological model perspective highlighting the systems level influence of acculturation and intergenerational experiences (Bronfenbrenner, 1994). (Hofstede, 2001) theory on acculturation (Kim & Abreu, 2001)	they had to leave Afghanistan due to growing antisemitism	unique ethnic and religious practices, which have become a salient cultural and religious identity for Afghan Jew: "be strong and proud" a prevailing attitude and strength that acted as a protective factor for many Afghan Jewish immigrants of both generations. When faced with adversity, this attitude was helpful to them in persevering and moving forward with their life. The hopefulness, humor, li…	Afghan Jews grew up in a culture where family and community values were the focal point of society and the experience of the acculturating to a culture where the focus shifts to the needs of the individual can be difficult and unsettling; their culture does not longer exist in their home country (due to IS): push & pull factors migration; refugees, not by free choice, within a nomadic background.…	difference first and second generation, religious identities, nomiadic nature, family business, family honour, religion, intermarriage, intergenerational gap, languge, gender differences, zionism, p.112 list of themes, reason for immigration, generational status, connection to home country, and psychological stressors. Religie wordt door deze joden meer als een traditie ervaren, dan het geloof, z…	interviews	interviews, she did them at people their houses and she tells that visiting their homes told her a lot, f.i. the visibility of mezuza	interviews	collectivism vs indiviualism, relevance of cultural values: strength and pride (in relation with an adversity); p 116 overview; The ability to hold both strong cultural values and a desire to integrate and succeed in American culture shows that Afghan Jews are challenged to make informed choices about the way they live their lives that benefit them both on an individual and collective level. Afgh…	qualitative research, f.i. grounded theory and difference 1st and 2nd generation, the impact of cultural values: They seem to not change intergenerationally, where behaviour does change. New themes evolved, which should be researched more thouroughly: zionism, colorism and gender issues	yes, page 54 (English language skills, emotional, position interviewer)	family honour kan de antwoorden in de studie hebben beinvloed: kleine gemeenschap, respondenten mogelijk herleidbaar en daarom zelfcensuur?	differences between generations: Afghan Jews define themselves differently. Sefardische joden zijn van oudsher makkelijker geintegreerd in hun landen (spanje, afrika, azie, etc) dan de azkenatische joden (duitsland, polen, etc). Daar meer disciminatie door christenen - gender verschillen in beleven, bv herinnering aan moederland...variabiliy in defining identity. small community: Extra important …
5	Gidley, B.; Kahn-Harris, K.;	Britain	no	not availabe	how communal leadership has defined the community and used this to legitimate its authority; it sheds light on how community works in practice in the period of the shift to liquid modernity. They state that the leaders emphasize antisimitsm so the community could survive. This as a response on becoming smaller and having 52% out marriages	a two-year sociological research study, qualitative interviews and documentary analysis, two case studies; jewish renewal movement (1990) + antisemitsm (2000)	analysis of an archive of documentary sources reflecting the diversity of and the debates within what we conceive of as the contemporary Anglo-Jewish public sphere alongside seventeen semi-structured interviews with key figures in the Anglo- Jewish community.	anglo-jewish key figures	17 Anglo-jewish key figures	the jews defined themselves as a religious community, defining themselves by the rules of Britain. The division within the community is on religious affiliation. During 19th century there was an interesting way the existing community dealt with the Azkenetische newcomers, by taking care of them within the jewish community and stimulating assimilation. in 1990 300.000 jews counted, 52% out marriag…	“risk”, by its very pervasiveness, seems to be the defining marker of our own less sanguine historical moment’ (quoted Mythen 2004: 2). For Bauman, the ‘liquid modernity’ of our age means living ‘under the constant condition of anxiety’, prone to become ‘neurotic about matters of security’ (1992: 697).			the threath of a disappearing jewish community.				no	no	no	the discursive repertoires used by the Anglo-Jewish communal leadership in order to legitimate its authority have shifted signifi- cantly over time. The shift in the discourse, we argue, reflects wider shifts within British society, from an official monoculturalism to an official multiculturalism (and beyond) and towards a growing societal concern with security as part of the ‘risk society’ or ‘l…	not only have Jews often been sus- picious of multicultural discourse, scholars interested in multiculturalism and minority issues in Britain have rarely considered the Jewish experience. We would contend, though, that our research has raised issues that have important implications for multiculturalism in general and for other minorities in particular. The politics of security – the insistence on…		yes: they argue antisemitism was stressed by the leaders to regain their power, personal and of their institutions. Also, the situation in Israel and how Israel is dealing with the palestinians. The story is consistent, but their evidence however is low.	Community has a particular resonance for Jews. It is within the community that Jewish practice becomes possible. This is true for religious reasons (such as the preference for prayer within a group of ten or more adult males); but also because Jewish institutions are needed to enable Jewish practices such as ritual slaughter and ritual bathing. For much of Jewish W6, Jews were organized in largel…
6	Glöckner, O.;	Germany	no	no	analyzes how RSJ professional and intellectual elites in Israel and Germany define themselves after resettlement and where do they see their scope of action – and perhaps even their “mission” -, presumed these elites have managed to integrate into their host society but remained interested in Russian Jewish issues (i.e., did not go the way of total assimilation). to what extent RSJ elites are act…	a qualitative research approach based on 70 half-structured expert interviews conducted in Israel and Germany between 2003 and 2009 and particpant observation		population: 1,7 miljoen RSJ, leaving Russia end 20th century, going to Israel, US and Germany - transnational connections and umbrella organizations. Participants in research: The range of interviewees included former and present members of the Russian Jewish elite – mainly professionals and intellectuals. The intellectual, cultural and professional Russian Jewish elites who emigrated to Israel a…	70, of which 35 in Germany	Russian speaking jews (RSJ) in Israel and Germany, German Jewish Community has more than tripled since 1989 by the influx of RSJ p. 18, psuh/pull). 70% holding an academic degree. A sstrong will to preerve the culture and language of origin; a transnational community? in the hosting countries identified as Russian. coherence and relative stability of the RSJ communities; good in networking and bu…	no	no definition	no	migration (push/pulll, see page 18)	a general trust and support for co-ethnic elites', 'Formation of new collective identities is not only dependant on internal group dynamics but also on the intensity of encounter with the host society, and with the host elites.' 'The request of Russian culture and art, Russian products on the “ethnic market” and also Russian media is unbowed, and the community itself is, as described in chapter 5…	unemployment, non acceptance by the native jews	cultural clash with native jewish communities, There is the fight for equality of positions and of the used languages; there are the intensive debates on content and programs of community work; there are the attempts of cultural rapprochement and demarcation, and there is – last but not least – the never ending debate on “Who is a Jew?”	yes, semi-structured questions: p.313	no	no	increasing economic security in private life normally correlates with a growing commitment in the local Jewish community (Cohen, 2006)	role and meaning of elites; studies on host-immigrant-relations, inside or outside the Jewish communities remained rare or were completely lacking.	need for anonimity; he cites persons by their full name, if they agreed with that.	no	a strong willingness to remain in contact with Russian culture and language alongside with Jewish culture and tradition; choosing only certain cultural elements from the respective host societies rather than adapting a complete culture.
7	Heitlinger, A.;J8	transnational	a grant from the Social Science and Humanities Research Council of Canada	not availabe		Using historical data, material from relevant Internet forums and websites, as well as personal experiences and observations, this article examines 12 Czech/Slovak Jewish reunions that have taken place since Communism collapsed and the country split into two separate states	analysed as case studies of autobiographical occasion, commemoration, reflective nostalgia and diasporic practice, addressing questions of identity, memory and group dynamics	Many of the participants have known each other since they were adolescents or young adults in the 1960s when, as part of their search for a Jewish identity, they joined several Jewish youth groups then in existence. The reunions have involved both those who emigrated (after the August 1968 Soviet invasion) and those who remained	a few 100	transnational generational community of Czech and Slovak Jews of the first post- Holocaust generation	The four overlapping concepts that I have found helpful in both addressing some of these issues and connecting them to the empirical evidence presented below are autobiographical occasion, commemoration, reflective nostalgia and diaspora.			holocaust & oppression by communism	One manifestation of the process of builiding Jewish identity after Holocaust was to “come out” publicly as Jews and to join a Jewish youth group. Meetings outside the kehille, at people their homes: religious study groups.' ' created the basis for enduring social bonds and networks of support.' shared experiences', a common cognitive and emotional language' 'nostalgically commemorating' 'gatheri…						the sense of belonging to such mildly conspiratorial and subversive groups had the potential of infusing the official categories of Jewishness with alternative meaning, and thus provided the young generation with an important source of empowerment and a sense of pride in their Jewish identity.
8	Joel, Carp;	united states	no	not availabe	describes the experience of the Chicago Jewish community as it planned and implemented a second responder strategy designed to provide the Jewish community with the capacity to meet a disaster; the need for a mental trauma resiliency and response strategy. to developing a community-wide trauma re- sponse and resiliency plan with the capabil- ity of responding to any trauma. To achieve its primary…	no study design	lterature was studied, experience of others, such as 9/11 and Israel was used, a consultant was hired	professionals working for the J-CERT	80 and more	Chicago Jewish community	J-CERT: a jewish community resilience team is created: 80 professionals who have been trained to use a variety of resiliency/trauma response models. The core group consists of a commander; four clinical leaders (two pri- mary and two back-up); five preassigned re- siliency teams, each with 10-12 team mem- bers and two team leaders; back-up team leaders; and a command group of personnel responsibl…	preparedness and awareness	not metioned	a nature disaster or an attack, like 9/11, other sudden trauma's that can hit the community; 'A critical incident is any unplanned event that has the potential to significantly affect an organization's security and safety, its im- age, or its operations, or poses a significant economic or legal liability. It is a situation out of the normal routine'. Three types 1) Critical Incident: Any Physical…	cooperation between Jewish organizations, preparedness by build community resiliency at the indi- vidual, family, and communal levels prior to a crisis: prepare, respond, recover. 1) Providing crisis intervention and trauma assistance 2) Providing emergency assistance: food, shelter, clothing, financial aid, guardian- ship, and assistance with funerals 3)Assisting the affected agencies in gaining…	denial	learn from experiences, by evaluating and analyzing the last event	no	no	no	most people primarily need assistance with acquiring or using the capac- ity they already have to regain control over their lives and to function within a frame- work of resiliency, rather than victimhood. A resiliency strategy postulates that even in the midst of disaster people have strengths they can draw on and that even in those circumstances they can learn about strengths they have that the…	no	no	no	no
9	Krasner Aronson, J.; Boxer, M.; Brookner, M. A.; Magidin de Kramer, R.; Saxe, L.;	united states	The Associated: Jewish Federation of Baltimore Combined Jewish Philanthropies of Greater Boston Jewish Federation of Greater Los Angeles Jewish Federation of Greater MetroWest NJ Jewish Federation of Greater Pittsburgh Jewish Federation of Greater Washington Jewish Federation of Palm Beach County Jewish Federation of South Palm Beach County Jewish Federation of St. Louis Jewish United Fund of Chi…		This report focuses on the impact of the crisis on the financial well-being and emotional health of respondents, and the roles Jewish institutions have played during the crisis. Research questions: How were members of the Jewish community affected by the pandemic, and who was most affected? How did Jewish organizations respond to the crisis? How did Judaism and online Jewish life help members of …	survey	survey, stratified random sample	Respondents screened in if they considered themselves Jewish and lived in the designated geographic area. Adults	Over 15,000 respondents across 10 communities	Baltimore area Jewish adults, jewish communities, whose core value is to have a sense of responsibility for each other. They differ f.i. in economic stablity	financial well being, coping and emotional health, relationships with jewish organisations, charitabel support to jewish goals, online jewis life	no definition	no	corona	financial well being, coping and emotional health, relationships with jewish organisations, charitabel support to jewish goals, online jewis life			no	yes	yes	Relationships with Jewish Organizations • Respondents who were highly engaged in Jewish communal life prior to the pandemic were more likely to receive all types of contact from Jewish organizations than those who were less engaged. Regardless of level of engagement, younger respondents were more likely to be contacted than were older respondents, except to ask how they were doing. Online Jewish …	no	no	no
10	Pirutinsky, S.; Cherniak, A. D.; Rosmarin, D. H.;	united states	no	no conflict of interest	The current study assessed the impact of the pandemic and explored the relation- ships between exposure, religiosity, and distress	cross-sectional design	survey: questionnaire 20 minutes	they resided in the USA and identified with an Orthodox Jewish religious affiliation. These participants were mostly female (72%), ranged in age from 18 to 83 (M = 39.17, SD = 15.71), and most were married (71%) or single/never-married (22%). Reported ethnicity was largely white (95%) and most were college educated (86%). Specific Orthodox affiliations included Hassidic (5%), Chabad/Lubavitch (3%…	419	othodox jews			We focused on three key religious variables that have previously been demonstrated to relate with mental health in the Jewish community: Intrinsic motivations for religiosity, positive/negative religious coping, and trust/mistrust in God (Pirutinsky and Rosmarin 2018; Rosmarin et al. 2017; Rosmarin et al. 2011a, b).	covid, based on that 18% more antisemitic incidents	Results indicated high levels of exposure, concern, and compliance with medical guidelines; however stress was generally low and we found evidence for positive impact. Direct exposure correlated with higher religiosity. Positive religious coping, intrinsic religiosity and trust in God strongly correlated with less stress and more positive impact, while negative religious coping and mistrust in Go…	low social income, less access to online	social support proffered by faith communities is generally an important mediator of the association between religion and health: religion can have positive and negative impact	no	survey questions and scales to assess key areas of religious experience		Public health initiatives, espe- cially stay-at-home orders, may be particularly stressful to Orthodox communities as they are characterized by a collective communal, familial, and social culture that values interaction with others (Heilman 2000). In fact, social support proffered by faith communities is generally an important mediator of the association between religion and health—both mental (K…		no	no	consistent and strong links between distress and religious variables in our study, these low levels of distress may reflect be unique resilience related to religious coping (Gerber et al. 2011). Fur- ther, given the family and community-centric culture of Orthodox Judaism and large family sizes of participants in our study, this may suggest that there are protective benefits under quarantine to b…
11	Pollock, D. M.;	woldwide	no	no	no	no study design	no methodology	jews, especially the orthodox	no number	jews worldwide	no	In psy- chological terms, resilience is defined as encountering a stress or trauma and emerging as strong or stronger from the expe- rience. Community resilience—the ability of a community to stick together and to help itself as a group as well as the families in its midst—is an important coping behavior.4	4. Ganor M, Ben-Lavy Y. Community resilience: Lessons derived from Gilo under fire. J Jew Communal Serv 2003;79:105.	disasters in general	The rabbinic imperative of tikkun olam (repairing the world) shapes the Jewish communal humanitarian responses to natural and man-made disasters providing victims short- term emergency aid and long-term recovery and rebuilding support. Agencies, including United Jewish Communities, the Joint Distribution Committee, and the American Jewish World Service, are important components of the voluntary a…			no	no	no	a recent study notes that 33% of the residents in areas affected by the Second Lebanon War exhibit post-traumatic stress symptoms,9 while the rate among Jewish residents and among Israeli Arabs was 26% and 41%, respectively. One of the possible explanatory factors in the differing reactions of the two groups is the higher level of community cohesiveness in the Jewish neighborhoods.	no	no	no
12	Storr, V. H.; Grube, L. E.; Haeffele-Balch, S.;	United States	Mercatus Center at George Mason University	not availabe	this research illustrates that civil society is in fact capable of robust response and recovery efforts post-disaster. We contribute to existing research on the role of civil society post-disaster by considering the arguments around polycentric versus monocentric orders. Polycentric = favorite: weet beter gebruik te maken van lokale resources en is flexibeler dan top-down; geeft ruimte aan lokale…	case study	in-dept qualitative interviews plus secondary sources are referenced throughout and include historical accounts of the Rockaway Peninsula, as well as newspaper and magazine articles about Hurricane Sandy recovery. They started talking with a broader group of people and decided to focus on the jewish community, because they had a strong response and recovery after Sandy. Focus on social services a…	the Orthodox Jewish community in the Rockaway Peninsula in New York		The community operates within a polycentric order and engages in the private provision of social services (such as food assistance, monetary aid, community centres, schools, ambulance services and public safety) both in mundane times and after disasters. It was a thriving community. Their institutions work for Jewish and non-Jewish people. the characteristics of the Orthodox Jewish community allo…	There is now a substantial literature in New Institutional Economics that recognizes the ability of communities to engage in collective action and to overcome significant challenges, such as managing common-pool resources (CPR), responding to neighbourhood crime, or overcoming the challenges associated with post-disaster recovery. this can be done polycentric and monocentric. The process of (poly…	How communities develop strategies for dealing with post-disaster challenges will be affected by various characteristics, such as the size of the group, existing norms of reciprocity, the level of heterogeneity among members, monitoring techniques and the information available to participants (Ostrom, 1998: 2; Ostrom and Walker, 2003).	Elinor Ostrom, Coyne and Lemke	Hurricane Sandy	characteristics that make cooperation especially effective, such as repeated interactions among community members and norms of reciprocity. Process of experimentation b(trial and error) ecause much knowledge is lacking in the beginning. Access to local knowledge. In the context of the Orthodox Jewish community, this local knowledge is transmitted through closely knit, often religiously based, soc…	Storr et al. (2015) show that communities with more loosely knit social networks were also able to coordinate recovery following Hurricane Katrina.	Within religious communities such as the Orthodox Jewish community, the relatively small group size and high costs of traditions and practices (i.e. the tradition of full-time yeshiva, or religious study, among males until age 40), help to explain generous giving towards public goods (Berman, 2000; Iannaccone, 1998). We recognize the role of strong social networks within the community, norms of r…				local actors devise strategies for the effective use of CPRs(common-pool resources). Similarly, in the post-disaster environment, scholars have shown how community members leverage social networks for mutual assistance, and in turn, contribute to community return and rebuilding (for example, see Beggs et al., 1996; Chamlee-Wright and Storr, 2009b; Chamlee-Wright, 2010; Aldrich, 2011, 2012; Storr …
13	Storr, V. H.; Haeffele-Balch, S.; Grube, L. E.;	united states	not mentioned	not available	This paper explores the post-disaster social learning process. we focus on the importance of social capital in facilitating social learning after a disaster, including facilitating community members’ ability to communicate their desire to return, to assess damage, to overcome barriers to rebuilding through collective yet voluntary action, and to learn from and imitate others’ successes. we examin…	qualitative research	in depth interviews, focused on community leaders; residents an non-profit groups	orthodox jewish community of rockaway peninsula, New York	16	residents and community leaderes of the Jewish Ortohodox community of Rockaway penisula	being able to deal with profound uncertainty post-disaster	Social capital, a term first thoroughly examined in the social sciences by Bourdieu (1985), has been used to describe the resources that individ- uals have access to because they belong to certain groups.3 Woolcock (2001) identifies three categories of social capital: bonding (i.e. the connections between members of close- knit homogenous groups), bridging (i.e. ties between members of heterogene…		Hurricane Sandy	the capacity of religious organizations, role of religious and lay leadership (social enterpreneurs), social capital and social learning; contacts of this community with others. In the post-disaster context, social learning—which takes place across bonding, bridging, and linking forms of social capital—occurs when communities are able to (a) adapt existing organization structures and (b) create n…	too much interference from mono-centric initiatives and policy makers		no	no	no	relation between social capital (individual) and social learning (coordinating, community level)	This paper makes explicit the often implicit connection between social capital and social learning in the literatures on post-disaster community recovery. Although there is now quite a sizeable literature on the role of religious groups after Hurricane Katrina, there has been little scholarship to date on the role of religious organizations after Hurricane Sandy. This paper helps to fill that gap.	no	no
14	Vanhamel, J.; Meudec, M.; Van Landeghem, E.; Ronse, M.; Gryseels, C.; Reyniers, T.; Rotsaert, A.; Ddungu, C.; Manirankunda, L.; Katsuva, D.; Koen, P. G.; Nöstlinger, C.;	belgium	unded by the Institute of Tropical Medicine’s COVID-19 Pump Priming fund supported by the Flemish Government, Science & Innovation	no competing interest	the main objective of this study was to rapidly assess the information and prevention needs among such communities in order to co-create and implement tailored prevention and communication measures where needed	an iterative and inductive study approach, emphasizing the community context as the research setting	We conducted an explorative qualitative study using a participatory approach. First, we performed a community mapping to identify relevant stakeholders. Through the active involvement of a community advisory board and based on qualitative interviews with key-informants and community members, we elicited lived experiences, attitudes, and perceptions towards COVID-19. Interviews were conducted both…	ll participants but one were male and aged between 30 and 75 years. Six interviews were conducted with a total of seven key informants (one qualied as a ‘duo interview’). These key informants were mainly members of the Antwerp Jewish communities with a leadership or coordinating function within the community (see Table 2). In addition to the key informant interviews, we also conducted nine in-dep…	15	the Orthodox Jewish communities of Antwerp (Belgium) during the rst lockdown period (March 2020 – May 2020); one of Europe’s largest communities of Orthodox Jews. The Jewish communities in Antwerp are currently estimated at about 25,000 members, roughly half of whom belong to the Orthodox and Haredi tradition				covid-19	rapid response, the active involvement of community and religious leaders in risk communication, Creating bottom-up and community-adapted communication strategies, including addressing language barriers and involving Rabbis in the dissemination of prevention messages, fostered a feeling of trust in government’s response measures; Increasing the engagement of communities in local decision-making a…	unmet information and prevention needs were also identied, such as the need for inclusive communication by public authorities and the need to mitigate the negative effects of stigmatization (antisemtism up with 18%).		no	no	no	1. the importance of engaging community and religious leaders in risk communication, 2. community experts can provide important advice on how to build on the social capital of community members in order to rapidly mobilize available resources, appealing to the resilient side of communities, 3. the involvement of community representatives in decision-making and governance structures might help to …	we lack insights into local communities’ experiences in coping with the current COVID-19 pandemic. documenting best practices of effective community engagement		ethical approval of the institutional review board of the Institute of Tropical Medicine, Antwerp
15	Vollhardt, J. R.; Nair, R.;	US	a Visionary grant from the American Psychological Foundation.	not available	explored through qualitative methods how members of diaspora groups with different histories of collective victimization experience its consequences within their communities (i.e., on the individual and intragroup levels). 'Our goal was to map out themes in peoples’ discussion of the individual and intragroup processes resulting from their ingroup’s collective victimization.	Based on our initial, inductive find- ings, we focused our analysis on how seemingly oppo- site, negative and positive experiences in the aftermath of collective victimization are juxtaposed—demonstrat- ing the two-sided nature of collective victimhood. xamining individual and intragroup responses to collective victimization among groups with different experiences of collective victimization, tem…	We conducted focus group interviews among four diaspora groups in the U.S. with historical or recent experiences of collective victimization. We chose two diaspora groups that experienced a historical genocide: Armenian and Jewish Americans. Both groups have been in the U.S. for several generations—with more recent immigration waves as well—and are currently relatively advantaged in terms of soci…	adult members from diaspora groups living in Worchester, Massachusetts.	We conducted eight focus groups, two among each community. This number is considered sufficient for exploring a topic (Braun & Clarke, 2013). The num- ber of participants per group ranged from 7 to 10 (M = 8). So 2 focus groups from the jewish of app 8 per focus group	four diaspora groups: Jewish american, armenian, 2 refugee groups: Buthan and Burundi	the group’s survival and strength (Ferguson et al., 2010). This also reflects victim groups’ need for restored agency and empowerment (Shnabel & Nadler, 2015).	the two-sided nature of collective victimhood	the dyadic, oppositional themata cate- gories remain stable, whereas their specific content may vary and change over time, based on the cultural and political context (Markova, 2015)	several, it is more about dealing with victimization in general	Table 2 B-side These were characterized by juxtapositions in line with the literature reviewed earlier, but provided a more detailed, in-depth account: (1) victimization, vulnerability and struggle versus survival, strength and resilience; (2) loss versus continuity and renewal; and (3) silence and lack of knowledge about ingroup victimization versus its commemoration and transmission. Strong con…	Table 2 A side victimization continues today	hree major foci shared across communities (but with different emphases within each focus), which included juxtaposed themes that highlight the two-sided nature of experiencing and coping with collective victimization and its aftermath: Vulnerability and struggle versus resilience and strength, loss versus continuity and renewal, and silence about versus transmission of knowledge about ingroup vic…	no	no	no	In sum, loss of community through collective victimization and diaspora life may create fear about the community’s future and the strong desire to rebuild it. Increased ingroup solidarity and social cohesion often results from collective threat (Coser, 1956) and may serve as a buffer against perceived loss of community. This reasoning again corresponds to research on ingroup-strengthening behavio…	Future research should further investigate how individuals and groups balance the need for empowerment and recognition of resilience and strength with acknowledgment of their group’s vulnerability and victimization. In all future research, it will be crucial to study more systematically how present-day status and distance from the events (including generational differences) impacts the ways in wh…	Ethical considerations. Due to the sensitive nature of the topic, we prepared participants for the questions and avoided asking about personal victimization. Participants were not pushed to talk about anything they did not want to talk about. In one case where a political disagreement between participants created tension, the researchers contacted the participants afterwards for further debriefin…	no	these findings highlight considerable variation in responses to collective victimization. There is not one homogenous response. Additionally, groups manage to integrate and oscillate between two seemingly opposite poles of the complex, multi-faceted experience of collective victimization, including both vulnerability and strength, loss and rebuilding.
16.	Horwitz, S.	the Gulf Coast region of the United States, New York in cooperation with Israel	not mentioned	not availabe	no	no study design	no methodology	no	no number	no	no	no definition	no	intifada, 9/11, hurricane katrina	Building a national network of trained trauma therapists and strengthening the capacity of local networks to alleviate the suffering of victims of terrorism in highly affected and underserved areas, Facilitating trauma trainings throughout the country for mental health profession- als (social workers, psychologists, and psychiatrists), primary care providers, emergency workers, teachers, and volu…	no	no	no	no	no	The best strategy for community building is a community empowerment approach that views community members as partners and capitalizes on their various strengths, assets, expertise, and organizational capac- ity. This "community as partner" approach appreciates that members of the affected communities are key to developing effec- tive strategies for dealing with problems and can benefit from addit…	no	no	no	this descibes ITC, a program, used In israel and in other countries
